# Supplementary material for: The phylogeographic structure of Lycianthes dejecta and Lycianthes peduncularis is explained by Pleistocene oscillations and reveals a new lineage
Source: Research Square preprint supplement (doi:10.21203/rs.3.rs-6521389/v1), 2025-06-17
Supplement: Supplementary file 2 [file 94ca58ec652f4f1fcd3ba83e.docx]

Plant Systematics and Evolution

**Supplementary Material – 4**

**Title**

The phylogeographic structure of *Lycianthes dejecta* and *Lycianthes peduncularis* is explained by Pleistocene oscillations and reveals a new lineage

**Authors**

Marco Antonio Anguiano-Constante, Daniel Sánchez Carbajal, Eduardo Ruiz Sanchez and Aarón Rodríguez

**Corresponding**

Herbario *Luz María Villarreal de Puga*, Departamento de Botánica y Zoología, Centro Universitario de Ciencias Biológicas y Agropecuarias, Universidad de Guadalajara, Zapopan, Jalisco, México

[aaron.rodriguez@academicos.udg.mx](mailto:aaron.rodriguez@academicos.udg.mx)


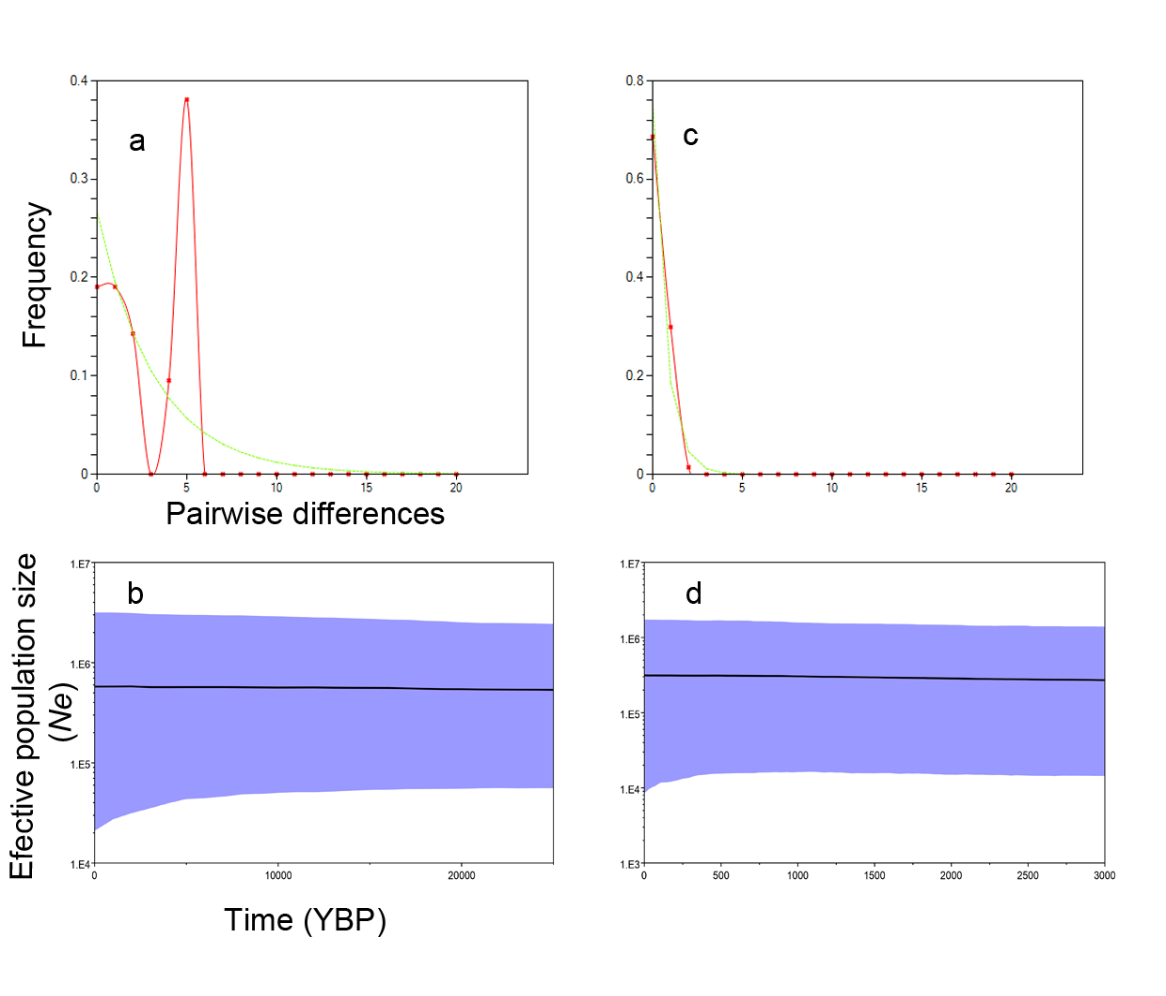


**Supplementary Figure 3.** Demographic history of *Lycianthes peduncularis*. (a) Mismatch distributions with sudden demographic/population expansion model of MSA population. (b) Variation in the effective population size (*Ne*) of MSA populations. (c) Mismatch distributions with sudden demographic/population expansion model of TCV+SMS population. (d) Variation in the effective population size (*Ne*) of TCV+SMS populations. On the mismatch distributions the green dotted line shows the frequency observed, and the red continuous line shows the frequency expected. On the Skyline plot the blue line represents the mean, and the blue area represents the limits of the 95% highest posterior density interval.
