# Supplementary material for: The phylogeographic structure of Lycianthes dejecta and Lycianthes peduncularis is explained by Pleistocene oscillations and reveals a new lineage
Source: Research Square preprint supplement (doi:10.21203/rs.3.rs-6521389/v1), 2025-06-17
Supplement: Supplementary file 3 [file e5aa9f89464204ef827b1a1b.xlsx]

## Sheet: Hoja1
species	X	Y
dejecta	-101.971	21.9078
dejecta	-102.644	21.8006
dejecta	-102.652	22.0017
dejecta	-102.641	21.9161
dejecta	-102.621	21.8636
dejecta	-109.917	23.5833
dejecta	-109.927	23.6041
dejecta	-110.028	23.5292
dejecta	-110.029	23.5237
dejecta	-109.883	23.6667
dejecta	-109.986	23.7027
dejecta	-109.942	23.6854
dejecta	-99.1203	19.5908
dejecta	-99.1315	19.4382
dejecta	-103.951	23.6792
dejecta	-100.584	21.4139
dejecta	-101.25	21
dejecta	-100.805	20.9988
dejecta	-100.785	20.8304
dejecta	-101.106	21.4317
dejecta	-100.274	20.9706
dejecta	-100.233	21.0667
dejecta	-100.3	20.9667
dejecta	-100.798	21.2189
dejecta	-100.095	21.2045
dejecta	-100.415	20.9031
dejecta	-100.636	20.4015
dejecta	-100.465	21.3386
dejecta	-100.343	21.3554
dejecta	-100.498	21.4625
dejecta	-100.483	21.2217
dejecta	-100.514	21.281
dejecta	-100.5	21.2667
dejecta	-100.728	20.9181
dejecta	-100.667	20.7833
dejecta	-100.66	20.4149
dejecta	-101.367	21.5648
dejecta	-98.5505	19.8104
dejecta	-99.0164	20.1745
dejecta	-99.3806	20.7601
dejecta	-99.3647	20.7373
dejecta	-98.9481	20.2667
dejecta	-99.3158	20.7717
dejecta	-98.944	19.9743
dejecta	-99.4752	20.1329
dejecta	-98.8751	19.9831
dejecta	-98.7526	19.9456
dejecta	-98.553	19.8193
dejecta	-99.3813	20.7333
dejecta	-101.724	21.1739
dejecta	-101.583	21.85
dejecta	-101.816	21.816
dejecta	-99.2141	19.8894
dejecta	-99.0961	19.5843
dejecta	-98.9833	19.6667
dejecta	-99.0864	19.5869
dejecta	-99.1089	19.5273
dejecta	-98.9521	20.2744
dejecta	-99.1919	19.8808
dejecta	-100.844	19.8697
dejecta	-101.134	19.6922
dejecta	-99.38	20.74
dejecta	-100.189	24.8334
dejecta	-99.8628	24.6933
dejecta	-99.7561	23.9475
dejecta	-99.9817	24.7441
dejecta	-99.9516	24.6628
dejecta	-99.7423	23.9703
dejecta	-97.5497	18.0248
dejecta	-97.0297	17.703
dejecta	-97.4638	18.1769
dejecta	-97.5463	18.2036
dejecta	-97.4732	18.1752
dejecta	-100.517	20.4961
dejecta	-99.9686	20.6885
dejecta	-99.8048	20.6877
dejecta	-100.421	20.5384
dejecta	-99.8167	20.6833
dejecta	-100.325	20.5062
dejecta	-100.286	20.5061
dejecta	-100.324	20.504
dejecta	-100.36	20.5326
dejecta	-100.505	20.5083
dejecta	-100.304	20.4961
dejecta	-99.7262	20.7905
dejecta	-99.9572	20.7508
dejecta	-99.8592	20.7717
dejecta	-99.9347	20.7354
dejecta	-99.9654	20.7487
dejecta	-100.336	20.5245
dejecta	-100.517	20.8167
dejecta	-99.9089	20.7981
dejecta	-100.507	20.8283
dejecta	-100.445	20.721
dejecta	-99.9686	20.7569
dejecta	-99.95	20.7467
dejecta	-100.733	21.8
dejecta	-100.695	22.1008
dejecta	-103.035	24.0185
peduncularis	-100.421	20.9019
peduncularis	-100.415	20.9016
peduncularis	-100.409	20.899
peduncularis	-100.279	20.976
peduncularis	-98.7146	20.3071
peduncularis	-99.5596	20.4277
peduncularis	-99.5427	20.4314
peduncularis	-99.4883	20.4253
peduncularis	-99.7233	20.4244
peduncularis	-99.0268	20.632
peduncularis	-99.0667	20.6167
peduncularis	-99.4	20.4167
peduncularis	-99.7042	20.307
peduncularis	-99.3945	20.8148
peduncularis	-99.3867	20.7772
peduncularis	-99.3333	20.05
peduncularis	-99.2167	20.4667
peduncularis	-99.405	20.7228
peduncularis	-99.5603	20.4184
peduncularis	-99.5575	20.4171
peduncularis	-99.2736	19.7355
peduncularis	-99.2155	19.8883
peduncularis	-99.1281	19.9992
peduncularis	-99.2229	19.8664
peduncularis	-99.2	19.8833
peduncularis	-99.195	19.8386
peduncularis	-98.0403	19.0522
peduncularis	-99.1853	19.8416
peduncularis	-96.3833	16.9167
peduncularis	-96.3243	16.932
peduncularis	-97.2444	17.4668
peduncularis	-96.5728	16.0706
peduncularis	-95.9257	16.5258
peduncularis	-97.5006	17.5128
peduncularis	-96.3	16.9167
peduncularis	-95.8729	16.4526
peduncularis	-95.9181	16.5246
peduncularis	-97.1816	17.4144
peduncularis	-97.5142	17.5115
peduncularis	-97.619	17.6317
peduncularis	-97.785	17.79
peduncularis	-97.3211	18.1401
peduncularis	-96.5261	16.2425
peduncularis	-95.894	16.4892
peduncularis	-97.1667	17.4333
peduncularis	-96.3002	16.9441
peduncularis	-96.7	17.0833
peduncularis	-96.393	16.9008
peduncularis	-96.0741	16.6622
peduncularis	-97.7002	17.8942
peduncularis	-96.0357	16.6135
peduncularis	-97.2215	17.85
peduncularis	-96.6414	16.9189
peduncularis	-96.6413	16.3067
peduncularis	-96.3078	16.8944
peduncularis	-96.3627	16.9219
peduncularis	-96.395	16.9261
peduncularis	-95.9992	16.4164
peduncularis	-96.5945	16.7158
peduncularis	-97.2641	17.377
peduncularis	-96.4208	17.274
peduncularis	-97.45	18.3833
peduncularis	-97.4465	18.4004
peduncularis	-97.5788	18.3795
peduncularis	-97.2959	18.4229
peduncularis	-97.4394	18.3642
peduncularis	-98.1239	18.9417
peduncularis	-99.7232	20.7904
peduncularis	-99.7859	20.84
peduncularis	-99.6524	20.8938
peduncularis	-99.9566	20.7423
peduncularis	-99.5378	20.9502
peduncularis	-99.7217	20.8029
peduncularis	-99.6749	20.7859
peduncularis	-99.7233	20.7813
