# Supplementary material for: The phylogeographic structure of Lycianthes dejecta and Lycianthes peduncularis is explained by Pleistocene oscillations and reveals a new lineage
Source: Research Square preprint supplement (doi:10.21203/rs.3.rs-6521389/v1), 2025-06-17
Supplement: Supplementary file 4 [file fe92515524ee47303da654df.docx]

Plant Systematics and Evolution

**Supplementary Material – 3**

**Title**

The phylogeographic structure of *Lycianthes dejecta* and *Lycianthes peduncularis* is explained by Pleistocene oscillations and reveals a new lineage

**Authors**

Marco Antonio Anguiano-Constante, Daniel Sánchez Carbajal, Eduardo Ruiz Sanchez and Aarón Rodríguez

**Corresponding**

Herbario *Luz María Villarreal de Puga*, Departamento de Botánica y Zoología, Centro Universitario de Ciencias Biológicas y Agropecuarias, Universidad de Guadalajara, Zapopan, Jalisco, México

[aaron.rodriguez@academicos.udg.mx](mailto:aaron.rodriguez@academicos.udg.mx)


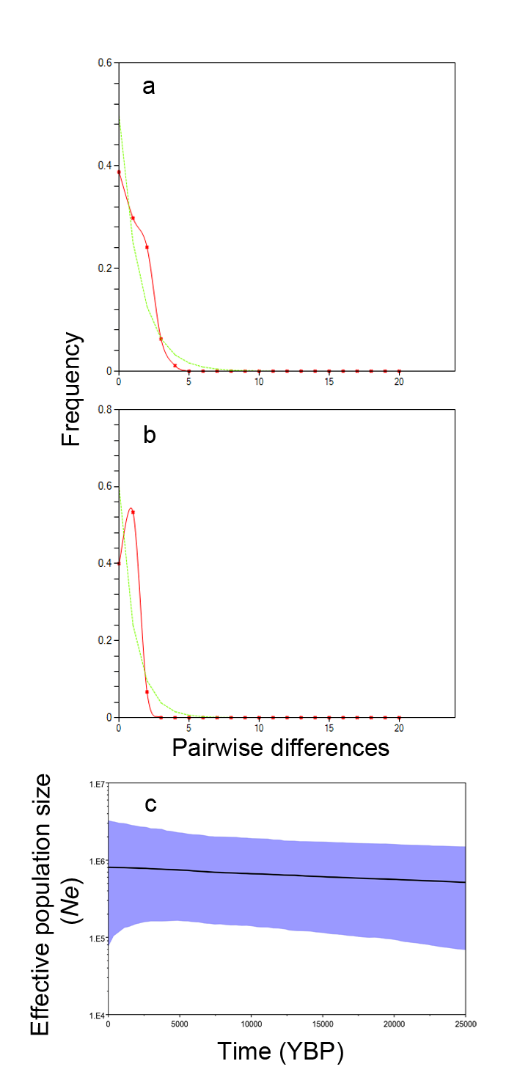


**Supplementary Figure 2.** Demographic history of *Lycianthes dejecta*. (a) Mismatch distributions with sudden demographic/populations expansion model of CHD populations. (b) Mismatch distribution with sudden demographic/population expansion model of BC population. The green dotted line shows the frequency expected. (c) Variation in the effective population size (*Ne*) of CHD populations. The blue line represents the mean and the blue areas represent the limits of the 95% highest posterior density interval.
